# Supplementary material for: Facile strategy for the development of polyglucopyranose–silver hydrogel/films for antimicrobial applications
Source: Royal Society of Chemistry journal article supplement (doi:10.1039/c6ra21632c), 2016-01-01
Supplement: c6ra21632c1.pdf [file c6ra21632c1.pdf]

## Supporting information

### Facile strategy for the development of polyglucopyranose -silver hydrogel/films for antimicrobial applications

Reshma Lali Raveendran<sup>a</sup>, Sudha J. Devaki <sup>a\*</sup> and K. Madhavan Nampoothiri<sup>b</sup>

Chemical Sciences and Technology Division, CSIR-National Institute for Interdisciplinary Science and Technology (CSIR-NIIST), Thiruvananthapuram, 695019, India.

Figure S1. FT-IR studies of A) polyglucopyranose B) SPC and C) SPCS4 hydrogel films.

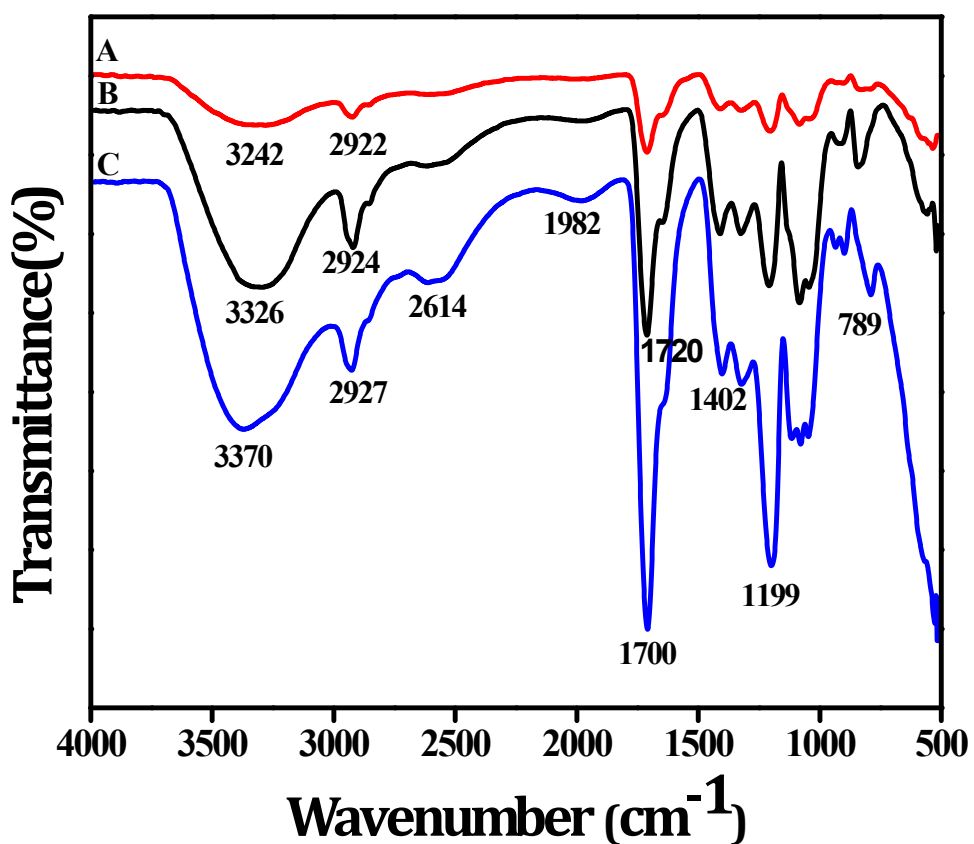

**Table S1. Experimental details of preparation of SPC and SPCS hydrogels films**

| Sample | Vol. of polyglucopyranose soln (5%) | Vol. of PVA soln (5%) | Citric acid (1 m L) | Amount of silver nitrate (1mL) | Experimental conditions | Duration for gel formation | Initial color/final color |
|--------|-------------------------------------|-----------------------|---------------------|--------------------------------|-------------------------|----------------------------|---------------------------|
| SPC    | 5mL                                 | 2 mL                  | 2 wt%               | 0                              | 60 °C<br>3 hrs          | 6 hrs                      | Colourless                |
| SPCS-1 | 5mL                                 | 2mL                   | 2 wt%               | $2 \times 10^{-2}$ M           | 60 °C<br>3 hrs          | 6 hrs                      | Light yellow              |
| SPCS-2 | 5mL                                 | 2mL                   | 2 wt%               | $4 \times 10^{-2}$ M           | 60 °C<br>3 hrs          | 6 hrs                      | Light brown               |
| SPCS-3 | 5mL                                 | 2mL                   | 2 wt%               | $6 \times 10^{-2}$ M           | 60 °C<br>3 hrs          | 6 hrs                      | Brown                     |
| SPCS-4 | 5mL                                 | 2mL                   | 2 wt%               | $8 \times 10^{-2}$ M           | 60 °C<br>3 hrs          | 6 hrs                      | Dark brown                |
